# Supplementary material for: Seasonality and scenario dependence of rapid Arctic sea ice loss events in CMIP6 simulations
Source: Copernicus journal article supplement (doi:10.5194/egusphere-2024-1873), 2024-07-01
Supplement: Supplementary file 1 [file egusphere-2024-1873-supplement.pdf]

**Supplement of Seasonality and scenario dependence of rapid Arctic sea ice loss events in CMIP6 simulations**

**Annelies Sticker et al.**

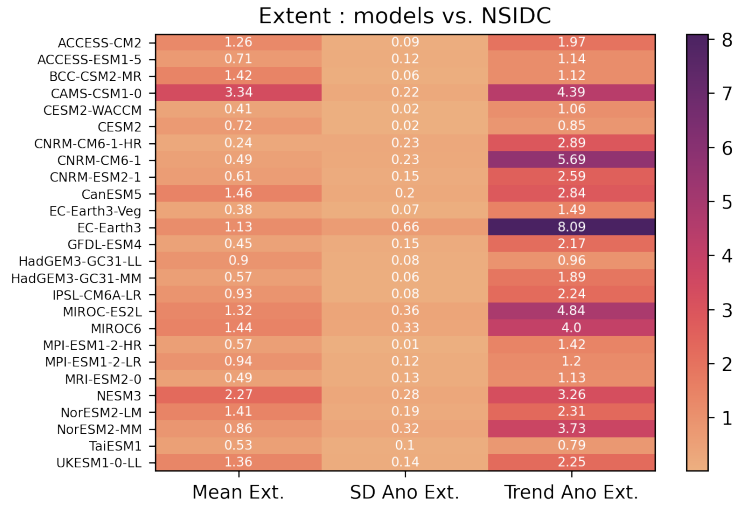

**Figure S1.** The SIE metrics of CMIP6 models. The three columns correspond to model performance metrics on the mean state (Mean Ext.), standard deviation (SD Ano), and trend (Trend Ano Ext.) of monthly anomalies of the Arctic SIE during the period 1979–2014 compared to the NSIDC-0051. Lower values indicate better skill.

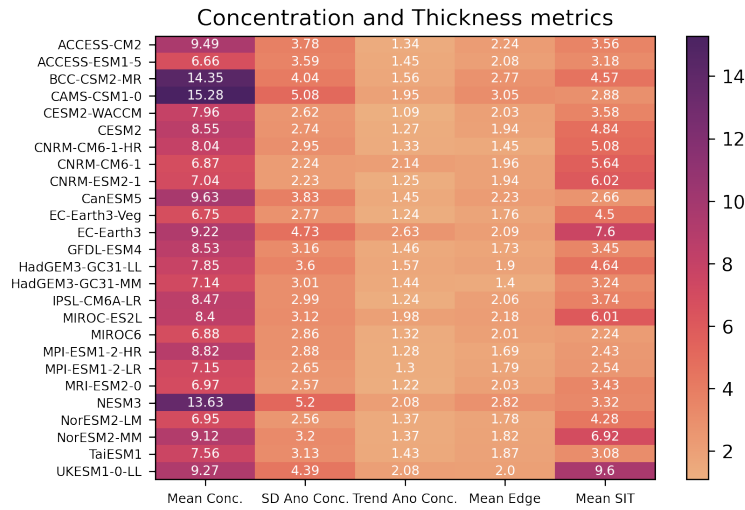

**Figure S2.** The SIC metrics of CMIP6 models output. The five columns correspond to model performance metrics on the Arctic SIC mean state (Mean Conc.), standard deviation (SD Ano), trend (Trend Ano.), the mean state Arctic sea ice-edge location metrics and the mean state of Arctic SIT of monthly anomalies during the period 1979–2014 compared to the NSIDC-0051 for SIC and PIOMAS reanalysis for SIT. Lower values indicate better skill.

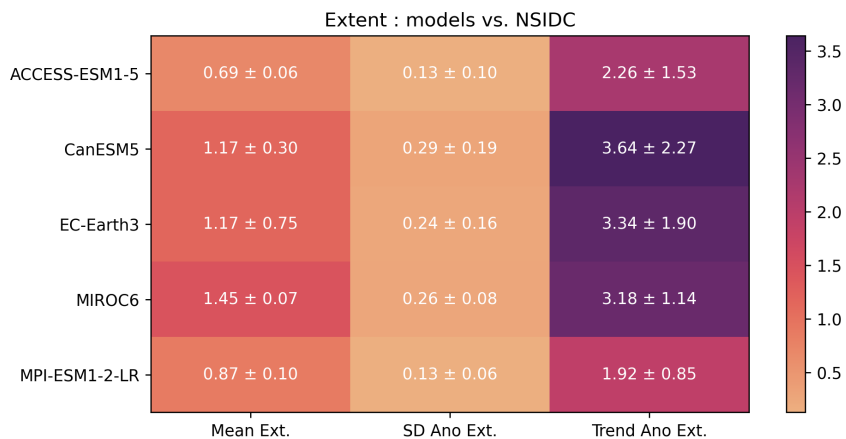

**Figure S3.** The SIE metrics of the five large ensembles. Values in white represent the mean and one standard deviation over metrics for each member. The three columns correspond to model performance metrics on the mean state (Mean Ext.), standard deviation (SD Ano), and trend (Trend Ano Ext.) of monthly anomalies of the Arctic SIE during the period 1979–2014 compared to the NSIDC-0051. Lower values indicate better skill.

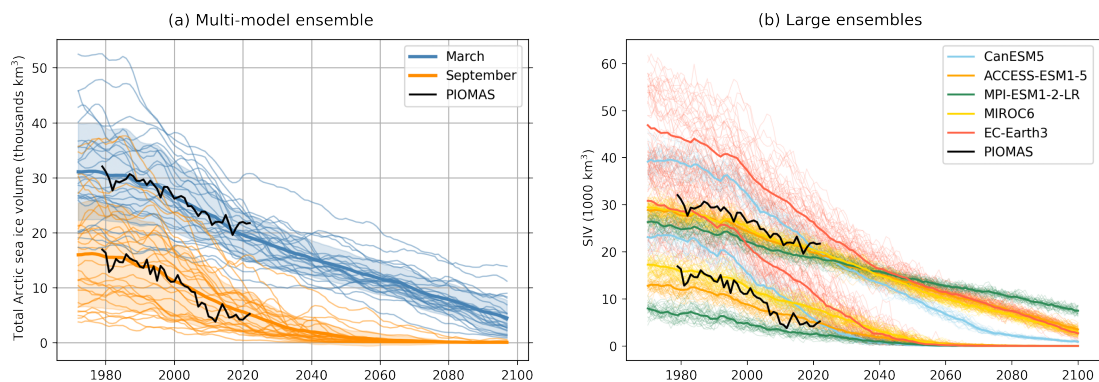

**Figure S4.** Same as Fig.1 but for SIV. The black lines show the PIOMAS reanalysis data.

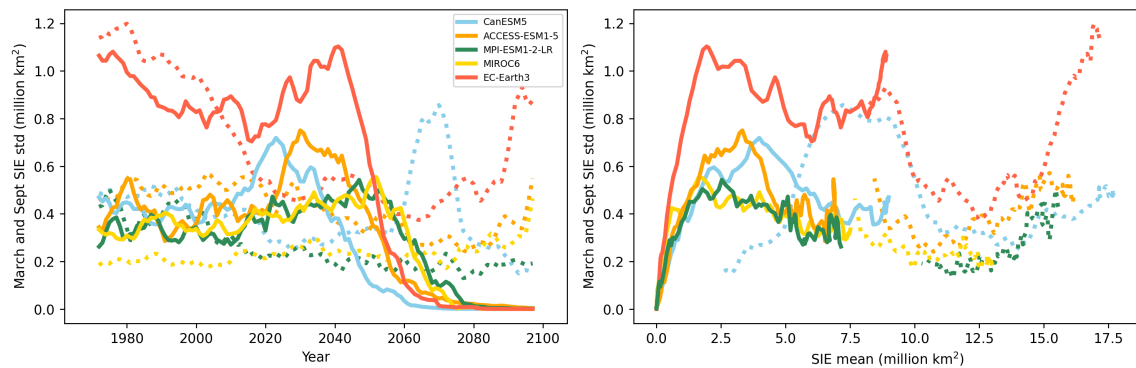

**Figure S5.** Standard deviation of the 5-year running mean SIE for March (dotted lines) and September (solid lines) as a function of time (left) and September and March SIE mean state (right) for the five large ensembles following high emission scenario SSP5-8.5.

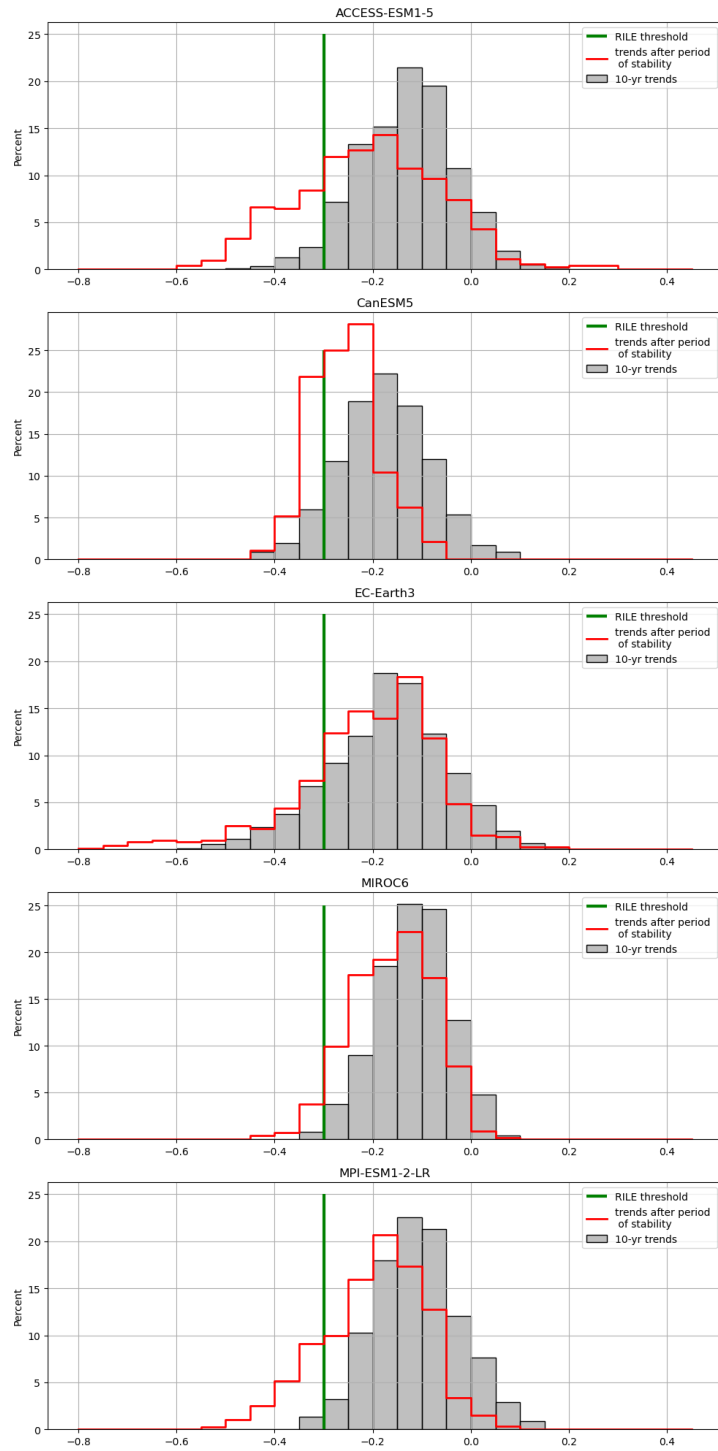

**Figure S6.** Same as Fig.6 but for the five large ensembles following the SSP5-8.5 scenario. For all large ensembles, the distribution of trends after a period of stability is statistically different from all 10-year trends at the 95% significance level using a z-test.

| <b>MODEL NAME</b>          | <b>ref historical simulations</b> | <b>ref SSP5-8.5 simulations</b> | <b>ref SSP1-2.6 simulations</b> |
|----------------------------|-----------------------------------|---------------------------------|---------------------------------|
| <b>1. ACCESS-CM2</b>       | Dix et al. (2019a)                | Dix et al. (2019c)              | Dix et al. (2019b)              |
| <b>2. ACCESS-ESM1-5</b>    | Ziehn et al. (2019a)              | Ziehn et al. (2019c)            | Ziehn et al. (2019b)            |
| <b>3. BCC-CSM2-MR</b>      | Wu et al. (2018)                  | Xin et al. (2019b)              | Xin et al. (2019a)              |
| <b>4. CAMS-CSM1-0</b>      | Rong (2019c)                      | Rong (2019b)                    | Rong (2019a)                    |
| <b>5. CESM2-WACCM</b>      | Danabasoglu (2019a)               | Danabasoglu (2019c)             | Danabasoglu (2019b)             |
| <b>6. CESM2</b>            | Danabasoglu (2019d)               | Danabasoglu (2019f)             | Danabasoglu (2019e)             |
| <b>7. CNRM-CM6-1-HR</b>    | Voltaire (2019a)                  | Voltaire (2019e)                | Voltaire (2020)                 |
| <b>8. CNRM-CM6-1</b>       | Voltaire (2018)                   | Voltaire (2019d)                | Voltaire (2019b)                |
| <b>9. CNRM-ESM2-1</b>      | Seferian (2018)                   | Voltaire (2019f)                | Voltaire (2019c)                |
| <b>10. CanESM5</b>         | Swart et al. (2019a)              | Swart et al. (2019c)            | Swart et al. (2019b)            |
| <b>11. EC-Earth3-Veg</b>   | (EC-Earth)                        | (EC-Earth)                      | (EC-Earth)                      |
| <b>12. EC-Earth3</b>       | (EC-Earth)                        | (EC-Earth)                      | (EC-Earth)                      |
| <b>13. GFDL-ESM4</b>       | Krasting et al. (2018)            | John et al. (2018b)             | John et al. (2018a)             |
| <b>14. HadGEM3-GC31-LL</b> | Ridley et al. (2019a)             | Good (2020b)                    | Good (2020a)                    |
| <b>15. HadGEM3-GC31-MM</b> | Ridley et al. (2019b)             | Jackson (2020b)                 | Jackson (2020a)                 |
| <b>16. IPSL-CM6A-LR</b>    | Boucher et al. (2018)             | Boucher et al. (2019b)          | Boucher et al. (2019a)          |
| <b>17. MIROC-ES2L</b>      | Hajima et al. (2019)              | Tachiiri et al. (2019b)         | Tachiiri et al. (2019a)         |
| <b>18. MIROC6</b>          | Tatebe and Watanabe (2018)        | Shiogama et al. (2019b)         | Shiogama et al. (2019a)         |
| <b>19. MPI-ESM1-2-HR</b>   | Jungclaus et al. (2019)           | Schupfner et al. (2019a)        | Schupfner et al. (2019b)        |
| <b>20. MPI-ESM1-2-LR</b>   | Wieners et al. (2019c)            | Wieners et al. (2019a)          | Wieners et al. (2019b)          |
| <b>21. MRI-ESM2-0</b>      | Yukimoto et al. (2019a)           | Yukimoto et al. (2019c)         | Yukimoto et al. (2019b)         |
| <b>22. NESM3</b>           | Cao and Wang (2019)               | Cao (2019b)                     | Cao (2019a)                     |
| <b>23. NorESM2-LM</b>      | Seland et al. (2019a)             | Seland et al. (2019c)           | Seland et al. (2019b)           |
| <b>24. NorESM2-MM</b>      | Bentsen et al. (2019a)            | Bentsen et al. (2019c)          | Bentsen et al. (2019b)          |
| <b>25. TaiESM1</b>         | Lee and Liang (2020a)             | Lee and Liang (2020c)           | Lee and Liang (2020b)           |
| <b>26. UKESM1-0-LL</b>     | Tang et al. (2019)                | Good et al. (2019b)             | Good et al. (2019a)             |

**Table S1.** References for different climate models under various scenarios

## References

- 5 Bentsen, M., Oliv  , D. J. L., Seland, y., Toniazzo, T., Gjermundsen, A., Graff, L. S., Debernard, J. B., Gupta, A. K., He, Y., Kirkev  g, A., Schwinger, J., Tjiputra, J., Aas, K. S., Bethke, I., Fan, Y., Griesfeller, J., Grini, A., Guo, C., Ilicak, M., Karset, I. H. H., Landgren, O. A., Liakka, J., Moseid, K. O., Nummelin, A., Spensberger, C., Tang, H., Zhang, Z., Heinze, C., Iversen, T., and Schulz, M.: NCC NorESM2-MM model output prepared for CMIP6 CMIP historical, <https://doi.org/10.22033/ESGF/CMIP6.8040>, 2019a.
- 10 Bentsen, M., Oliv  , D. J. L., Seland, y., Toniazzo, T., Gjermundsen, A., Graff, L. S., Debernard, J. B., Gupta, A. K., He, Y., Kirkev  g, A., Schwinger, J., Tjiputra, J., Aas, K. S., Bethke, I., Fan, Y., Griesfeller, J., Grini, A., Guo, C., Ilicak, M., Karset, I. H. H., Landgren, O. A., Liakka, J., Moseid, K. O., Nummelin, A., Spensberger, C., Tang, H., Zhang, Z., Heinze, C., Iversen, T., and Schulz, M.: NCC NorESM2-MM model output prepared for CMIP6 ScenarioMIP ssp126, <https://doi.org/10.22033/ESGF/CMIP6.8250>, 2019b.
- 15 Bentsen, M., Oliv  , D. J. L., Seland, y., Toniazzo, T., Gjermundsen, A., Graff, L. S., Debernard, J. B., Gupta, A. K., He, Y., Kirkev  g, A., Schwinger, J., Tjiputra, J., Aas, K. S., Bethke, I., Fan, Y., Griesfeller, J., Grini, A., Guo, C., Ilicak, M., Karset, I. H. H., Landgren, O. A., Liakka, J., Moseid, K. O., Nummelin, A., Spensberger, C., Tang, H., Zhang, Z., Heinze, C., Iversen, T., and Schulz, M.: NCC NorESM2-MM model output prepared for CMIP6 ScenarioMIP ssp585, <https://doi.org/10.22033/ESGF/CMIP6.8321>, 2019c.
- Boucher, O., Denvil, S., Levavasseur, G., Cozic, A., Caubel, A., Foujols, M.-A., Meurdesoif, Y., Cadule, P., Devilliers, M., Ghattas, J., Lebas, N., Lurton, T., Mellul, L., Musat, I., Mignot, J., and Cheruy, F.: IPSL IPSL-CM6A-LR model output prepared for CMIP6 CMIP historical, <https://doi.org/10.22033/ESGF/CMIP6.5195>, 2018.
- 20 Boucher, O., Denvil, S., Levavasseur, G., Cozic, A., Caubel, A., Foujols, M.-A., Meurdesoif, Y., Cadule, P., Devilliers, M., Dupont, E., and Lurton, T.: IPSL IPSL-CM6A-LR model output prepared for CMIP6 ScenarioMIP SSP126, <https://doi.org/10.22033/ESGF/CMIP6.5262>, 2019a.
- Boucher, O., Denvil, S., Levavasseur, G., Cozic, A., Caubel, A., Foujols, M.-A., Meurdesoif, Y., Cadule, P., Devilliers, M., Dupont, E., and Lurton, T.: IPSL IPSL-CM6A-LR model output prepared for CMIP6 ScenarioMIP SSP585, <https://doi.org/10.22033/ESGF/CMIP6.5271>, 2019b.
- 25 Cao, J.: NUIST NESMv3 model output prepared for CMIP6 ScenarioMIP SSP126, <https://doi.org/10.22033/ESGF/CMIP6.8780>, 2019a.
- Cao, J.: NUIST NESMv3 model output prepared for CMIP6 ScenarioMIP SSP585, <https://doi.org/10.22033/ESGF/CMIP6.8790>, 2019b.
- Cao, J. and Wang, B.: NUIST NESMv3 model output prepared for CMIP6 CMIP historical, <https://doi.org/10.22033/ESGF/CMIP6.8769>, 2019.
- 30 Danabasoglu, G.: NCAR CESM2-WACCM model output prepared for CMIP6 CMIP historical, <https://doi.org/10.22033/ESGF/CMIP6.10071>, 2019a.
- Danabasoglu, G.: NCAR CESM2-WACCM model output prepared for CMIP6 ScenarioMIP SSP126, <https://doi.org/10.22033/ESGF/CMIP6.10100>, 2019b.
- Danabasoglu, G.: NCAR CESM2-WACCM model output prepared for CMIP6 ScenarioMIP SSP585, <https://doi.org/10.22033/ESGF/CMIP6.10115>, 2019c.
- 35 Danabasoglu, G.: NCAR CESM2 model output prepared for CMIP6 CMIP historical, <https://doi.org/10.22033/ESGF/CMIP6.7627>, 2019d.
- Danabasoglu, G.: NCAR CESM2 model output prepared for CMIP6 ScenarioMIP SSP126, <https://doi.org/10.22033/ESGF/CMIP6.7746>, 2019e.
- Danabasoglu, G.: NCAR CESM2 model output prepared for CMIP6 ScenarioMIP SSP585, <https://doi.org/10.22033/ESGF/CMIP6.7768>, 2019f.
- 40 Dix, M., Bi, D., Dobrohotoff, P., Fiedler, R., Harman, I., Law, R., Mackallah, C., Marsland, S., O'Farrell, S., Rashid, H., Sribnovsky, J., Sullivan, A., Trenham, C., Vohralik, P., Watterson, I., Williams, G., Woodhouse, M., Bodman, R., Dias, F. B., Domingues, C. M., Hannah, N., Heerdegen, A., Savita, A., Wales, S., Allen, C., Druken, K., Evans, B., Richards, C., Ridzwan, S. M., Roberts, D., Smillie, J., Snow, K., Ward, M., and Yang, R.: CSIRO-ARCCSS ACCESS-CM2 model output prepared for CMIP6 CMIP historical, <https://doi.org/10.22033/ESGF/CMIP6.4271>, 2019a.
- 45 Dix, M., Bi, D., Dobrohotoff, P., Fiedler, R., Harman, I., Law, R., Mackallah, C., Marsland, S., O'Farrell, S., Rashid, H., Sribnovsky, J., Sullivan, A., Trenham, C., Vohralik, P., Watterson, I., Williams, G., Woodhouse, M., Bodman, R., Dias, F. B., Domingues, C. M., Hannah, N., Heerdegen, A., Savita, A., Wales, S., Allen, C., Druken, K., Evans, B., Richards, C., Ridzwan, S. M., Roberts, D., Smillie, J., Snow, K., Ward, M., and Yang, R.: CSIRO-ARCCSS ACCESS-CM2 model output prepared for CMIP6 ScenarioMIP SSP126, <https://doi.org/10.22033/ESGF/CMIP6.4319>, 2019b.
- 50 Dix, M., Bi, D., Dobrohotoff, P., Fiedler, R., Harman, I., Law, R., Mackallah, C., Marsland, S., O'Farrell, S., Rashid, H., Sribnovsky, J., Sullivan, A., Trenham, C., Vohralik, P., Watterson, I., Williams, G., Woodhouse, M., Bodman, R., Dias, F. B., Domingues, C. M., Hannah, N., Heerdegen, A., Savita, A., Wales, S., Allen, C., Druken, K., Evans, B., Richards, C., Ridzwan, S. M., Roberts, D., Smillie, J., Snow, K., Ward, M., and Yang, R.: CSIRO-ARCCSS ACCESS-CM2 model output prepared for CMIP6 ScenarioMIP SSP585, <https://doi.org/10.22033/ESGF/CMIP6.4332>, 2019c.

- 55 (EC-Earth), E.-E. C.: EC-Earth-Consortium EC-Earth3 model output prepared for CMIP6 CMIP historical, <https://doi.org/10.22033/ESGF/CMIP6.4700>, 2019a.
- (EC-Earth), E.-E. C.: EC-Earth-Consortium EC-Earth3-Veg model output prepared for CMIP6 CMIP historical, <https://doi.org/10.22033/ESGF/CMIP6.4706>, 2019b.
- (EC-Earth), E.-E. C.: EC-Earth-Consortium EC-Earth3 model output prepared for CMIP6 ScenarioMIP SSP126, <https://doi.org/10.22033/ESGF/CMIP6.4874>, 2019c.
- 60 (EC-Earth), E.-E. C.: EC-Earth-Consortium EC-Earth3-Veg model output prepared for CMIP6 ScenarioMIP SSP126, <https://doi.org/10.22033/ESGF/CMIP6.4876>, 2019d.
- (EC-Earth), E.-E. C.: EC-Earth-Consortium EC-Earth3 model output prepared for CMIP6 ScenarioMIP SSP585, <https://doi.org/10.22033/ESGF/CMIP6.4912>, 2019e.
- 65 (EC-Earth), E.-E. C.: EC-Earth-Consortium EC-Earth3-Veg model output prepared for CMIP6 ScenarioMIP SSP585, <https://doi.org/10.22033/ESGF/CMIP6.4914>, 2019f.
- Good, P.: MOHC HadGEM3-GC31-LL model output prepared for CMIP6 ScenarioMIP SSP126, <https://doi.org/10.22033/ESGF/CMIP6.10849>, 2020a.
- Good, P.: MOHC HadGEM3-GC31-LL model output prepared for CMIP6 ScenarioMIP SSP585, <https://doi.org/10.22033/ESGF/CMIP6.10901>, 2020b.
- 70 Good, P., Sellar, A., Tang, Y., Rumbold, S., Ellis, R., Kelley, D., and Kuhlbrodt, T.: MOHC UKESM1.0-LL model output prepared for CMIP6 ScenarioMIP SSP126, <https://doi.org/10.22033/ESGF/CMIP6.6333>, 2019a.
- Good, P., Sellar, A., Tang, Y., Rumbold, S., Ellis, R., Kelley, D., and Kuhlbrodt, T.: MOHC UKESM1.0-LL model output prepared for CMIP6 ScenarioMIP SSP585, <https://doi.org/10.22033/ESGF/CMIP6.6405>, 2019b.
- 75 Hajima, T., Abe, M., Arakawa, O., Suzuki, T., Komuro, Y., Ogura, T., Ogochi, K., Watanabe, M., Yamamoto, A., Tatebe, H., Noguchi, M. A., Ohgaito, R., Ito, A., Yamazaki, D., Ito, A., Takata, K., Watanabe, S., Kawamiya, M., and Tachiiri, K.: MIROC MIROC-ES2L model output prepared for CMIP6 CMIP historical, <https://doi.org/10.22033/ESGF/CMIP6.5602>, 2019.
- Jackson, L.: MOHC HadGEM3-GC31-MM model output prepared for CMIP6 ScenarioMIP SSP126, <https://doi.org/10.22033/ESGF/CMIP6.10850>, 2020a.
- 80 Jackson, L.: MOHC HadGEM3-GC31-MM model output prepared for CMIP6 ScenarioMIP SSP585, <https://doi.org/10.22033/ESGF/CMIP6.10902>, 2020b.
- John, J. G., Blanton, C., McHugh, C., Radhakrishnan, A., Rand, K., Vahlenkamp, H., Wilson, C., Zadeh, N. T., Dunne, J. P., Dussin, R., Horowitz, L. W., Krasting, J. P., Lin, P., Malyshev, S., Naik, V., Ploshay, J., Shevliakova, E., Silvers, L., Stock, C., Winton, M., and Zeng, Y.: NOAA-GFDL GFDL-ESM4 model output prepared for CMIP6 ScenarioMIP SSP126, <https://doi.org/10.22033/ESGF/CMIP6.8684>, 2018a.
- 85 John, J. G., Blanton, C., McHugh, C., Radhakrishnan, A., Rand, K., Vahlenkamp, H., Wilson, C., Zadeh, N. T., Dunne, J. P., Dussin, R., Horowitz, L. W., Krasting, J. P., Lin, P., Malyshev, S., Naik, V., Ploshay, J., Shevliakova, E., Silvers, L., Stock, C., Winton, M., and Zeng, Y.: NOAA-GFDL GFDL-ESM4 model output prepared for CMIP6 ScenarioMIP SSP585, <https://doi.org/10.22033/ESGF/CMIP6.8706>, 2018b.
- 90 Jungclaus, J., Bittner, M., Wieners, K.-H., Wachsmann, F., Schupfner, M., Legutke, S., Giorgetta, M., Reick, C., Gayler, V., Haak, H., de Vrese, P., Raddatz, T., Esch, M., Mauritsen, T., von Storch, J.-S., Behrens, J., Brovkin, V., Claussen, M., Crueger, T., Fast, I., Fiedler, S., Hagemann, S., Hohenegger, C., Jahns, T., Kloster, S., Kinne, S., Lasslop, G., Kornblueh, L., Marotzke, J., Matei, D., Meraner, K., Mikolajewicz, U., Modali, K., Müller, W., Nabel, J., Notz, D., Peters-von Gehlen, K., Pincus, R., Pohlmann, H., Pongratz, J., Rast, S., Schmidt, H., Schnur, R., Schulzweida, U., Six, K., Stevens, B., Voigt, A., and Roeckner, E.: MPI-M MPI-ESM1.2-HR model output prepared for CMIP6 CMIP historical, <https://doi.org/10.22033/ESGF/CMIP6.6594>, 2019.
- 95 Krasting, J. P., John, J. G., Blanton, C., McHugh, C., Nikonov, S., Radhakrishnan, A., Rand, K., Zadeh, N. T., Balaji, V., Durachta, J., Dupuis, C., Menzel, R., Robinson, T., Underwood, S., Vahlenkamp, H., Dunne, K. A., Gauthier, P. P., Ginoux, P., Griffies, S. M., Hallberg, R., Harrison, M., Hurlin, W., Malyshev, S., Naik, V., Paulot, F., Paynter, D. J., Ploshay, J., Reichl, B. G., Schwarzkopf, D. M., Seman, C. J., Silvers, L., Wyman, B., Zeng, Y., Adcroft, A., Dunne, J. P., Dussin, R., Guo, H., He, J., Held, I. M., Horowitz, L. W., Lin, P., Milly, P., Shevliakova, E., Stock, C., Winton, M., Wittenberg, A. T., Xie, Y., and Zhao, M.: NOAA-GFDL GFDL-ESM4 model output prepared for CMIP6 CMIP historical, <https://doi.org/10.22033/ESGF/CMIP6.8597>, 2018.
- 100 Lee, W.-L. and Liang, H.-C.: AS-RCEC TaiESM1.0 model output prepared for CMIP6 CMIP historical, <https://doi.org/10.22033/ESGF/CMIP6.9755>, 2020a.
- Lee, W.-L. and Liang, H.-C.: AS-RCEC TaiESM1.0 model output prepared for CMIP6 ScenarioMIP ssp126, <https://doi.org/10.22033/ESGF/CMIP6.9806>, 2020b.
- 105 Lee, W.-L. and Liang, H.-C.: AS-RCEC TaiESM1.0 model output prepared for CMIP6 ScenarioMIP ssp585, <https://doi.org/10.22033/ESGF/CMIP6.9823>, 2020c.



- Ridley, J., Menary, M., Kuhlbrodt, T., Andrews, M., and Andrews, T.: MOHC HadGEM3-GC31-LL model output prepared for CMIP6 CMIP historical, <https://doi.org/10.22033/ESGF/CMIP6.6109>, 2019a.
- 110 Ridley, J., Menary, M., Kuhlbrodt, T., Andrews, M., and Andrews, T.: MOHC HadGEM3-GC31-MM model output prepared for CMIP6 CMIP historical, <https://doi.org/10.22033/ESGF/CMIP6.6112>, 2019b.
- Rong, X.: CAMS CAMS-CSM1.0 model output prepared for CMIP6 ScenarioMIP SSP126, <https://doi.org/10.22033/ESGF/CMIP6.11046>, 2019a.
- 115 Rong, X.: CAMS CAMS-CSM1.0 model output prepared for CMIP6 ScenarioMIP SSP585, <https://doi.org/10.22033/ESGF/CMIP6.11052>, 2019b.
- Rong, X.: CAMS CAMS\_CSM1.0 model output prepared for CMIP6 CMIP historical, <https://doi.org/10.22033/ESGF/CMIP6.9754>, 2019c.
- Schupfner, M., Wieners, K.-H., Wachsmann, F., Steger, C., Bittner, M., Jungclaus, J., Früh, B., Pankatz, K., Giorgetta, M., Reick, C., Legutke, S., Esch, M., Gayler, V., Haak, H., de Vrese, P., Raddatz, T., Mauritsen, T., von Storch, J.-S., Behrens, J., Brovkin, V., Claussen, M., Crueger, T., Fast, I., Fiedler, S., Hagemann, S., Hohenegger, C., Jahns, T., Kloster, S., Kinne, S., Lasslop, G., Kornblueh, L., Marotzke, J.,
- 120 Matei, D., Meraner, K., Mikolajewicz, U., Modali, K., Müller, W., Nabel, J., Notz, D., Peters-von Gehlen, K., Pincus, R., Pohlmann, H., Pongratz, J., Rast, S., Schmidt, H., Schnur, R., Schulzweida, U., Six, K., Stevens, B., Voigt, A., and Roeckner, E.: DKRZ MPI-ESM1.2-HR model output prepared for CMIP6 ScenarioMIP SSP585, <https://doi.org/10.22033/ESGF/CMIP6.4403>, 2019a.
- Schupfner, M., Wieners, K.-H., Wachsmann, F., Steger, C., Bittner, M., Jungclaus, J., Früh, B., Pankatz, K., Giorgetta, M., Reick, C., Legutke, S., Esch, M., Gayler, V., Haak, H., de Vrese, P., Raddatz, T., Mauritsen, T., von Storch, J.-S., Behrens, J., Brovkin, V., Claussen, M., Crueger, T., Fast, I., Fiedler, S., Hagemann, S., Hohenegger, C., Jahns, T., Kloster, S., Kinne, S., Lasslop, G., Kornblueh, L., Marotzke, J.,
- 125 Matei, D., Meraner, K., Mikolajewicz, U., Modali, K., Müller, W., Nabel, J., Notz, D., Peters-von Gehlen, K., Pincus, R., Pohlmann, H., Pongratz, J., Rast, S., Schmidt, H., Schnur, R., Schulzweida, U., Six, K., Stevens, B., Voigt, A., and Roeckner, E.: DKRZ MPI-ESM1.2-HR model output prepared for CMIP6 ScenarioMIP SSP126, <https://doi.org/10.22033/ESGF/CMIP6.4397>, 2019b.
- Seferian, R.: CNRM-CERFACS CNRM-ESM2-1 model output prepared for CMIP6 CMIP historical, <https://doi.org/10.22033/ESGF/CMIP6.4068>, 2018.
- Seland, y., Bentsen, M., Olivieri, D. J. L., Toniazzo, T., Gjermundsen, A., Graff, L. S., Debernard, J. B., Gupta, A. K., He, Y., Kirkevåg, A., Schwinger, J., Tjiputra, J., Aas, K. S., Bethke, I., Fan, Y., Griesfeller, J., Grini, A., Guo, C., Ilicak, M., Karset, I. H. H., Landgren, O. A., Liakka, J., Moseid, K. O., Nummelin, A., Spensberger, C., Tang, H., Zhang, Z., Heinze, C., Iversen, T., and Schulz, M.: NCC NorESM2-LM model output prepared for CMIP6 CMIP historical, <https://doi.org/10.22033/ESGF/CMIP6.8036>, 2019a.
- 135 Seland, y., Bentsen, M., Olivieri, D. J. L., Toniazzo, T., Gjermundsen, A., Graff, L. S., Debernard, J. B., Gupta, A. K., He, Y., Kirkevåg, A., Schwinger, J., Tjiputra, J., Aas, K. S., Bethke, I., Fan, Y., Griesfeller, J., Grini, A., Guo, C., Ilicak, M., Karset, I. H. H., Landgren, O. A., Liakka, J., Moseid, K. O., Nummelin, A., Spensberger, C., Tang, H., Zhang, Z., Heinze, C., Iversen, T., and Schulz, M.: NCC NorESM2-LM model output prepared for CMIP6 ScenarioMIP ssp126, <https://doi.org/10.22033/ESGF/CMIP6.8248>, 2019b.
- Seland, y., Bentsen, M., Olivieri, D. J. L., Toniazzo, T., Gjermundsen, A., Graff, L. S., Debernard, J. B., Gupta, A. K., He, Y., Kirkevåg, A., Schwinger, J., Tjiputra, J., Aas, K. S., Bethke, I., Fan, Y., Griesfeller, J., Grini, A., Guo, C., Ilicak, M., Karset, I. H. H., Landgren, O. A., Liakka, J., Moseid, K. O., Nummelin, A., Spensberger, C., Tang, H., Zhang, Z., Heinze, C., Iversen, T., and Schulz, M.: NCC NorESM2-LM model output prepared for CMIP6 ScenarioMIP ssp585, <https://doi.org/10.22033/ESGF/CMIP6.8319>, 2019c.
- 140 Shiogama, H., Abe, M., and Tatebe, H.: MIROC MIROC6 model output prepared for CMIP6 ScenarioMIP SSP126, <https://doi.org/10.22033/ESGF/CMIP6.5743>, 2019a.
- 145 Shiogama, H., Abe, M., and Tatebe, H.: MIROC MIROC6 model output prepared for CMIP6 ScenarioMIP SSP585, <https://doi.org/10.22033/ESGF/CMIP6.5771>, 2019b.
- Swart, N. C., Cole, J. N., Kharin, V. V., Lazare, M., Scinocca, J. F., Gillett, N. P., Anstey, J., Arora, V., Christian, J. R., Jiao, Y., Lee, W. G., Majaess, F., Saenko, O. A., Seiler, C., Seinen, C., Shao, A., Solheim, L., von Salzen, K., Yang, D., Winter, B., and Sigmund, M.: CCCma CanESM5 model output prepared for CMIP6 CMIP historical, <https://doi.org/10.22033/ESGF/CMIP6.3610>, 2019a.
- 150 Swart, N. C., Cole, J. N., Kharin, V. V., Lazare, M., Scinocca, J. F., Gillett, N. P., Anstey, J., Arora, V., Christian, J. R., Jiao, Y., Lee, W. G., Majaess, F., Saenko, O. A., Seiler, C., Seinen, C., Shao, A., Solheim, L., von Salzen, K., Yang, D., Winter, B., and Sigmund, M.: CCCma CanESM5 model output prepared for CMIP6 ScenarioMIP SSP126, <https://doi.org/10.22033/ESGF/CMIP6.3683>, 2019b.
- Swart, N. C., Cole, J. N., Kharin, V. V., Lazare, M., Scinocca, J. F., Gillett, N. P., Anstey, J., Arora, V., Christian, J. R., Jiao, Y., Lee, W. G., Majaess, F., Saenko, O. A., Seiler, C., Seinen, C., Shao, A., Solheim, L., von Salzen, K., Yang, D., Winter, B., and Sigmund, M.: CCCma CanESM5 model output prepared for CMIP6 ScenarioMIP SSP585, <https://doi.org/10.22033/ESGF/CMIP6.3696>, 2019c.
- 155 Tachiiri, K., Abe, M., Hajima, T., Arakawa, O., Suzuki, T., Komuro, Y., Ogochi, K., Watanabe, M., Yamamoto, A., Tatebe, H., Noguchi, M. A., Ohgaito, R., Ito, A., Yamazaki, D., Ito, A., Takata, K., Watanabe, S., and Kawamiya, M.: MIROC MIROC-ES2L model output prepared for CMIP6 ScenarioMIP SSP126, <https://doi.org/10.22033/ESGF/CMIP6.5742>, 2019a.

- 160 Tachiiri, K., Abe, M., Hajima, T., Arakawa, O., Suzuki, T., Komuro, Y., Ogochi, K., Watanabe, M., Yamamoto, A., Tatebe, H., Noguchi, M. A., Ohgaito, R., Ito, A., Yamazaki, D., Ito, A., Takata, K., Watanabe, S., and Kawamiya, M.: MIROC MIROC-ES2L model output prepared for CMIP6 ScenarioMIP SSP585, <https://doi.org/10.22033/ESGF/CMIP6.5770>, 2019b.
- Tang, Y., Rumbold, S., Ellis, R., Kelley, D., Mulcahy, J., Sellar, A., Walton, J., and Jones, C.: MOHC UKESM1.0-LL model output prepared for CMIP6 CMIP historical, <https://doi.org/10.22033/ESGF/CMIP6.6113>, 2019.
- 165 Tatebe, H. and Watanabe, M.: MIROC MIROC6 model output prepared for CMIP6 CMIP historical, <https://doi.org/10.22033/ESGF/CMIP6.5603>, 2018.
- Voldoire, A.: CMIP6 simulations of the CNRM-CERFACS based on CNRM-CM6-1 model for CMIP experiment historical, <https://doi.org/10.22033/ESGF/CMIP6.4066>, 2018.
- Voldoire, A.: CNRM-CERFACS CNRM-CM6-1-HR model output prepared for CMIP6 CMIP historical, <https://doi.org/10.22033/ESGF/CMIP6.4067>, 2019a.
- 170 Voldoire, A.: CNRM-CERFACS CNRM-CM6-1 model output prepared for CMIP6 ScenarioMIP SSP126, <https://doi.org/10.22033/ESGF/CMIP6.4184>, 2019b.
- Voldoire, A.: CNRM-CERFACS CNRM-ESM2-1 model output prepared for CMIP6 ScenarioMIP ssp126, <https://doi.org/10.22033/ESGF/CMIP6.4186>, 2019c.
- Voldoire, A.: CNRM-CERFACS CNRM-CM6-1 model output prepared for CMIP6 ScenarioMIP SSP585, <https://doi.org/10.22033/ESGF/CMIP6.4224>, 2019d.
- 175 Voldoire, A.: CNRM-CERFACS CNRM-CM6-1-HR model output prepared for CMIP6 ScenarioMIP SSP585, <https://doi.org/10.22033/ESGF/CMIP6.4225>, 2019e.
- Voldoire, A.: CNRM-CERFACS CNRM-ESM2-1 model output prepared for CMIP6 ScenarioMIP ssp585, <https://doi.org/10.22033/ESGF/CMIP6.4226>, 2019f.
- 180 Voldoire, A.: CNRM-CERFACS CNRM-CM6-1-HR model output prepared for CMIP6 ScenarioMIP ssp126, <https://doi.org/10.22033/ESGF/CMIP6.4185>, 2020.
- Wieners, K.-H., Giorgetta, M., Jungclaus, J., Reick, C., Esch, M., Bittner, M., Gayler, V., Haak, H., de Vrese, P., Raddatz, T., Mauritsen, T., von Storch, J.-S., Behrens, J., Brovkin, V., Claussen, M., Crueger, T., Fast, I., Fiedler, S., Hagemann, S., Hohenegger, C., Jahns, T., Kloster, S., Kinne, S., Lasslop, G., Kornblueh, L., Marotzke, J., Matei, D., Meraner, K., Mikolajewicz, U., Modali, K., Müller, W., Nabel, J., Notz, D., Peters-von Gehlen, K., Pincus, R., Pohlmann, H., Pongratz, J., Rast, S., Schmidt, H., Schnur, R., Schulzweida, U., Six, K., Stevens, B., Voigt, A., and Roeckner, E.: MPI-M MPI-ESM1.2-LR model output prepared for CMIP6 ScenarioMIP SSP585, <https://doi.org/10.22033/ESGF/CMIP6.6705>, 2019a.
- 185 Wieners, K.-H., Giorgetta, M., Jungclaus, J., Reick, C., Esch, M., Bittner, M., Gayler, V., Haak, H., de Vrese, P., Raddatz, T., Mauritsen, T., von Storch, J.-S., Behrens, J., Brovkin, V., Claussen, M., Crueger, T., Fast, I., Fiedler, S., Hagemann, S., Hohenegger, C., Jahns, T., Kloster, S., Kinne, S., Lasslop, G., Kornblueh, L., Marotzke, J., Matei, D., Meraner, K., Mikolajewicz, U., Modali, K., Müller, W., Nabel, J., Notz, D., Peters-von Gehlen, K., Pincus, R., Pohlmann, H., Pongratz, J., Rast, S., Schmidt, H., Schnur, R., Schulzweida, U., Six, K., Stevens, B., Voigt, A., and Roeckner, E.: MPI-M MPI-ESM1.2-LR model output prepared for CMIP6 ScenarioMIP SSP126, <https://doi.org/10.22033/ESGF/CMIP6.6690>, 2019b.
- 190 Wieners, K.-H., Giorgetta, M., Jungclaus, J., Reick, C., Esch, M., Bittner, M., Legutke, S., Schupfner, M., Wachsmann, F., Gayler, V., Haak, H., de Vrese, P., Raddatz, T., Mauritsen, T., von Storch, J.-S., Behrens, J., Brovkin, V., Claussen, M., Crueger, T., Fast, I., Fiedler, S., Hagemann, S., Hohenegger, C., Jahns, T., Kloster, S., Kinne, S., Lasslop, G., Kornblueh, L., Marotzke, J., Matei, D., Meraner, K., Mikolajewicz, U., Modali, K., Müller, W., Nabel, J., Notz, D., Peters-von Gehlen, K., Pincus, R., Pohlmann, H., Pongratz, J., Rast, S., Schmidt, H., Schnur, R., Schulzweida, U., Six, K., Stevens, B., Voigt, A., and Roeckner, E.: MPI-M MPI-ESM1.2-LR model output prepared for CMIP6 CMIP historical, <https://doi.org/10.22033/ESGF/CMIP6.6595>, 2019c.
- 200 Wu, T., Chu, M., Dong, M., Fang, Y., Jie, W., Li, J., Li, W., Liu, Q., Shi, X., Xin, X., Yan, J., Zhang, F., Zhang, J., Zhang, L., and Zhang, Y.: BCC BCC-CSM2MR model output prepared for CMIP6 CMIP historical, <https://doi.org/10.22033/ESGF/CMIP6.2948>, 2018.
- Xin, X., Wu, T., Shi, X., Zhang, F., Li, J., Chu, M., Liu, Q., Yan, J., Ma, Q., and Wei, M.: BCC BCC-CSM2MR model output prepared for CMIP6 ScenarioMIP SSP126, <https://doi.org/10.22033/ESGF/CMIP6.3028>, 2019a.
- Xin, X., Wu, T., Shi, X., Zhang, F., Li, J., Chu, M., Liu, Q., Yan, J., Ma, Q., and Wei, M.: BCC BCC-CSM2MR model output prepared for CMIP6 ScenarioMIP SSP585, <https://doi.org/10.22033/ESGF/CMIP6.3050>, 2019b.
- 205 Yukimoto, S., Koshiro, T., Kawai, H., Oshima, N., Yoshida, K., Urakawa, S., Tsujino, H., Deushi, M., Tanaka, T., Hosaka, M., Yoshimura, H., Shindo, E., Mizuta, R., Ishii, M., Obata, A., and Adachi, Y.: MRI MRI-ESM2.0 model output prepared for CMIP6 CMIP historical, <https://doi.org/10.22033/ESGF/CMIP6.6842>, 2019a.
- 210 Yukimoto, S., Koshiro, T., Kawai, H., Oshima, N., Yoshida, K., Urakawa, S., Tsujino, H., Deushi, M., Tanaka, T., Hosaka, M., Yoshimura, H., Shindo, E., Mizuta, R., Ishii, M., Obata, A., and Adachi, Y.: MRI MRI-ESM2.0 model output prepared for CMIP6 ScenarioMIP SSP126, <https://doi.org/10.22033/ESGF/CMIP6.6909>, 2019b.

- Yukimoto, S., Koshiro, T., Kawai, H., Oshima, N., Yoshida, K., Urakawa, S., Tsujino, H., Deushi, M., Tanaka, T., Hosaka, M., Yoshimura, H., Shindo, E., Mizuta, R., Ishii, M., Obata, A., and Adachi, Y.: MRI MRI-ESM2.0 model output prepared for CMIP6 ScenarioMIP SSP585, <https://doi.org/10.22033/ESGF/CMIP6.6929>, 2019c.
- 215 Ziehn, T., Chamberlain, M., Lenton, A., Law, R., Bodman, R., Dix, M., Wang, Y., Dobrohotoff, P., Srbinovsky, J., Stevens, L., Vohralik, P., Mackallah, C., Sullivan, A., O'Farrell, S., and Druken, K.: CSIRO ACCESS-ESM1.5 model output prepared for CMIP6 CMIP historical, <https://doi.org/10.22033/ESGF/CMIP6.4272>, 2019a.
- Ziehn, T., Chamberlain, M., Lenton, A., Law, R., Bodman, R., Dix, M., Wang, Y., Dobrohotoff, P., Srbinovsky, J., Stevens, L., Vohralik, P., Mackallah, C., Sullivan, A., O'Farrell, S., and Druken, K.: CSIRO ACCESS-ESM1.5 model output prepared for CMIP6 ScenarioMIP
- 220 SSP126, <https://doi.org/10.22033/ESGF/CMIP6.4320>, 2019b.
- Ziehn, T., Chamberlain, M., Lenton, A., Law, R., Bodman, R., Dix, M., Wang, Y., Dobrohotoff, P., Srbinovsky, J., Stevens, L., Vohralik, P., Mackallah, C., Sullivan, A., O'Farrell, S., and Druken, K.: CSIRO ACCESS-ESM1.5 model output prepared for CMIP6 ScenarioMIP SSP585, <https://doi.org/10.22033/ESGF/CMIP6.4333>, 2019c.
